# Supplementary material for: Impact of Exercise and Aging on Rat Urine and Blood Metabolome. An LC-MS Based Metabolomics Longitudinal Study
Source: Metabolites. 2017 Feb 23;7(1):10. doi: 10.3390/metabo7010010 (PMC5372213; doi:10.3390/metabo7010010)
Supplement: Supplementary file 1 [file metabolites-07-00010-s001.pdf]

**Supplementary Materials: Impact of Exercise and Aging on Rat Urine and Blood Metabolome. An LC-MS Based Metabolomics Longitudinal Study**

**Olga Deda, Helen G. Gika, Ioannis Taitzoglou, Nikolaos Raikos and Georgios Theodoridis**

**Table S1:** Detected compounds found in analyzed urine samples using the applied HILIC-MS/MS method.

| Detected metabolites           |                 |                        |
|--------------------------------|-----------------|------------------------|
| 2-Hydroxy-3-methylbutyric acid | Guanine         | Tryptophan             |
| 3-(4-Hydroxyphenyl)lactate     | Histamine       | Tyrosine               |
| 3-Methylhistidine              | Hypotaurine     | Myoinositol            |
| Adenine                        | Hypoxanthine    | N-Acetylaspartic acid  |
| Adenosine                      | Inosine         | Niacinamide            |
| Alpha-Hydroxyisobutyric acid   | Kynurenic acid  | Ornithine              |
| Alpha-Lactose                  | Acetylcarnitine | Pantothenic acid       |
| Arabinose                      | Alanine         | Putrescine             |
| Betaine                        | Arginine        | Pyridoxine             |
| Biotin                         | Asparagine      | Pyroglutamic acid      |
| Cadaverine                     | Glutamic acid   | Pyruvic acid           |
| Choline                        | Glutamine       | Raffinose              |
| Citrulline                     | Histidine       | Riboflavin             |
| Cotinine                       | Isoleucine      | Sarcosine              |
| Creatine                       | Leucine         | Sucrose                |
| Creatinine                     | Lysine          | Taurine                |
| Cytidine                       | Malic acid      | Thiamine               |
| Arabitol                       | Methionine      | Thymidine              |
| Glucose                        | Phenylalanine   | Trimethylamine         |
| Dimethylamine                  | Proline         | Trimethylamine N-oxide |
| Xylitol                        | Serine          | Tryptamine             |
| Xylose                         | Threonine       | Uridine                |
| Gamma-Aminobutyric acid        | Mannitol        | Valine                 |
| Glycine                        | Methylamine     |                        |

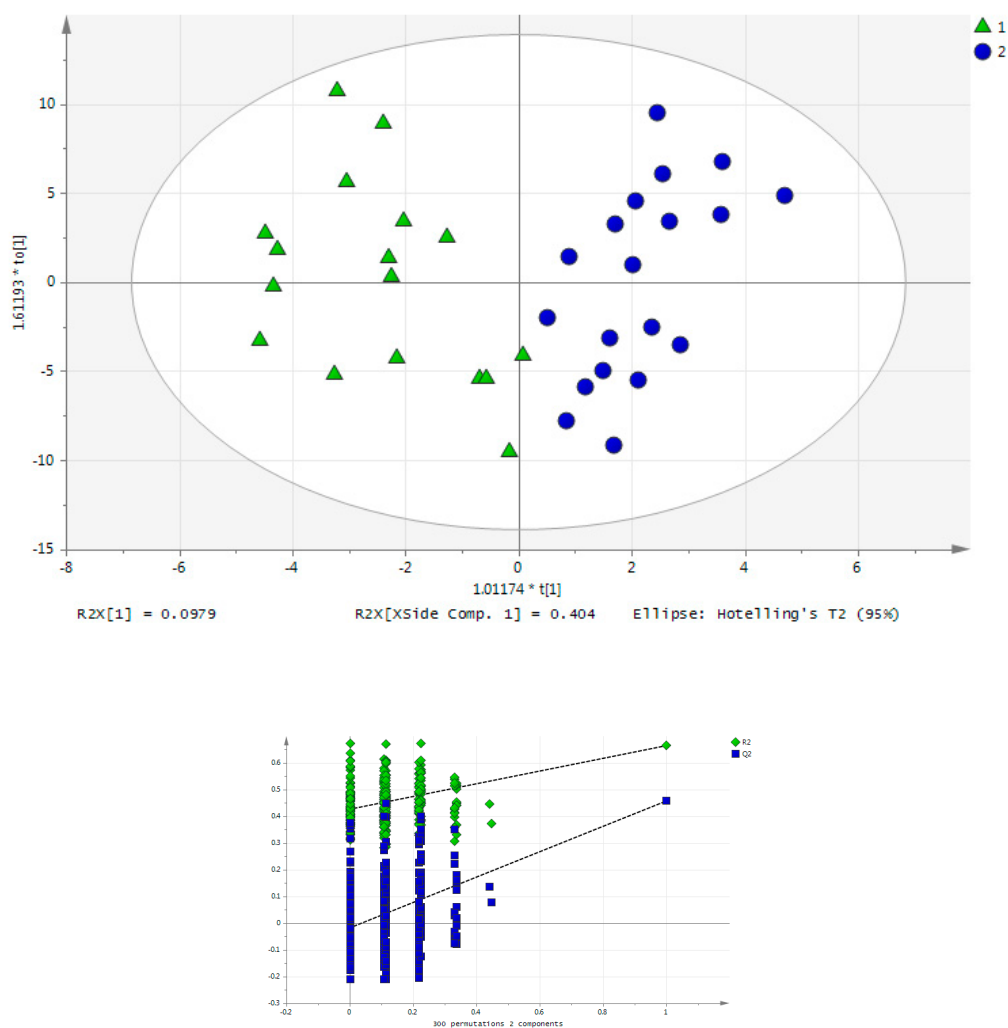

**Figure S1:** OPLS-DA scores plot of rat urine samples of sedentary group A (blue) and exercise group B (green) at the fifth sampling time point. The inset permutation plot demonstrates a statistically significant model.

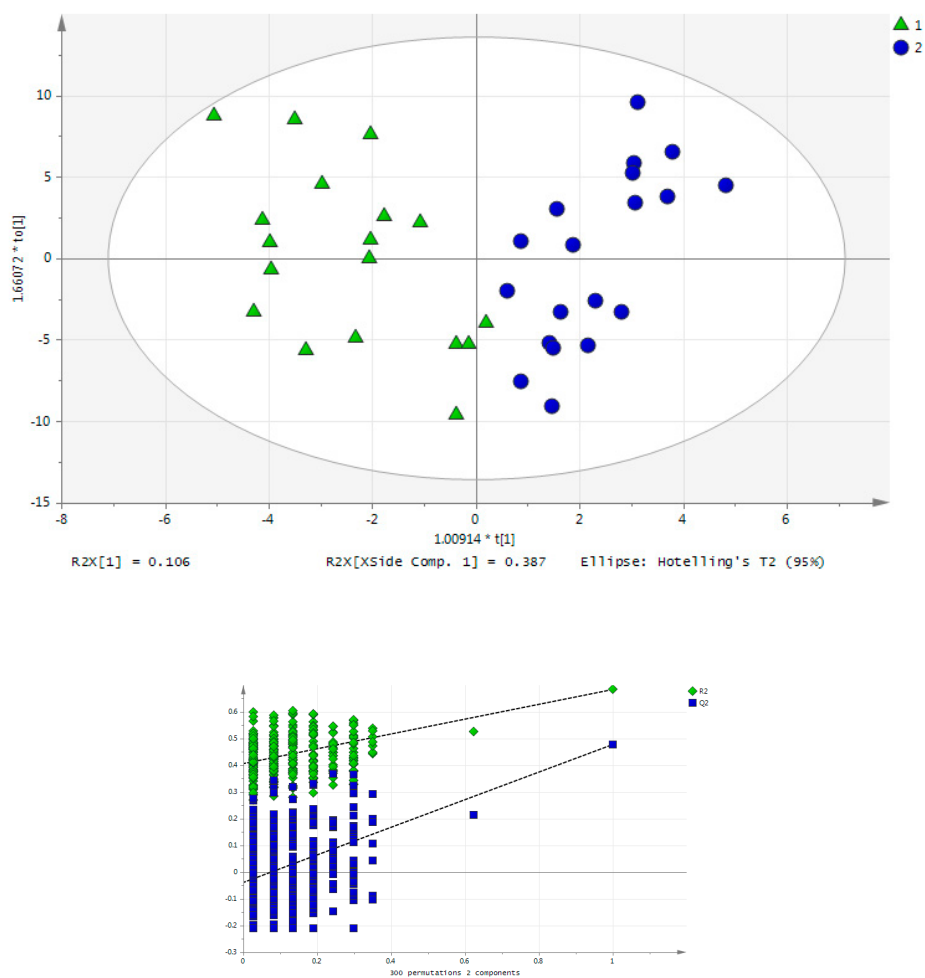

**Figure S2:** OPLS-DA scores plot of rat urine samples of sedentary group A (blue) and exercise group B (green) at the seventh sampling time point. The inset permutation plot demonstrates a statistically significant model.

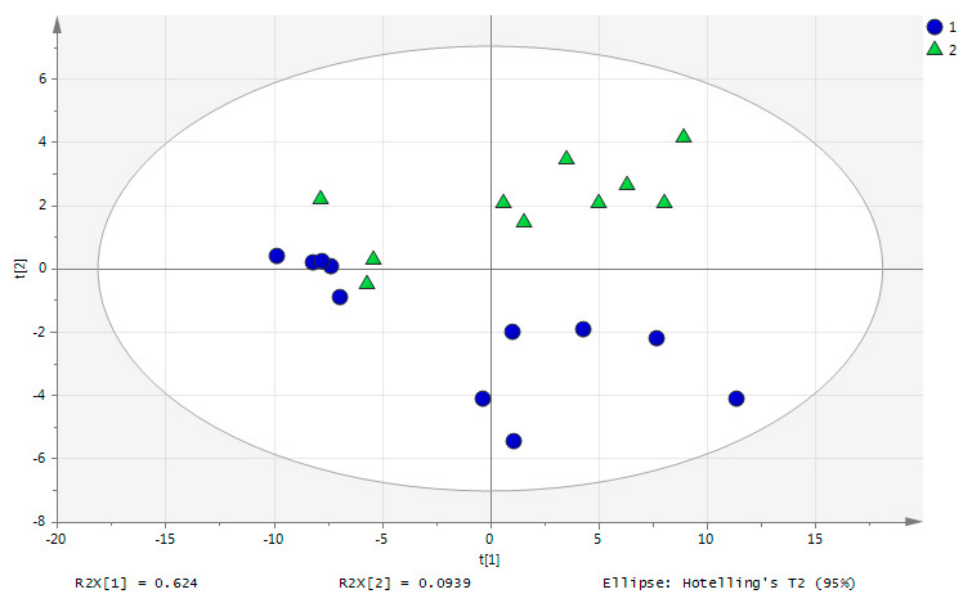

**Figure S3:** PCA scores plot of rat urine samples before (blue) and after (green) the acute exercise session.

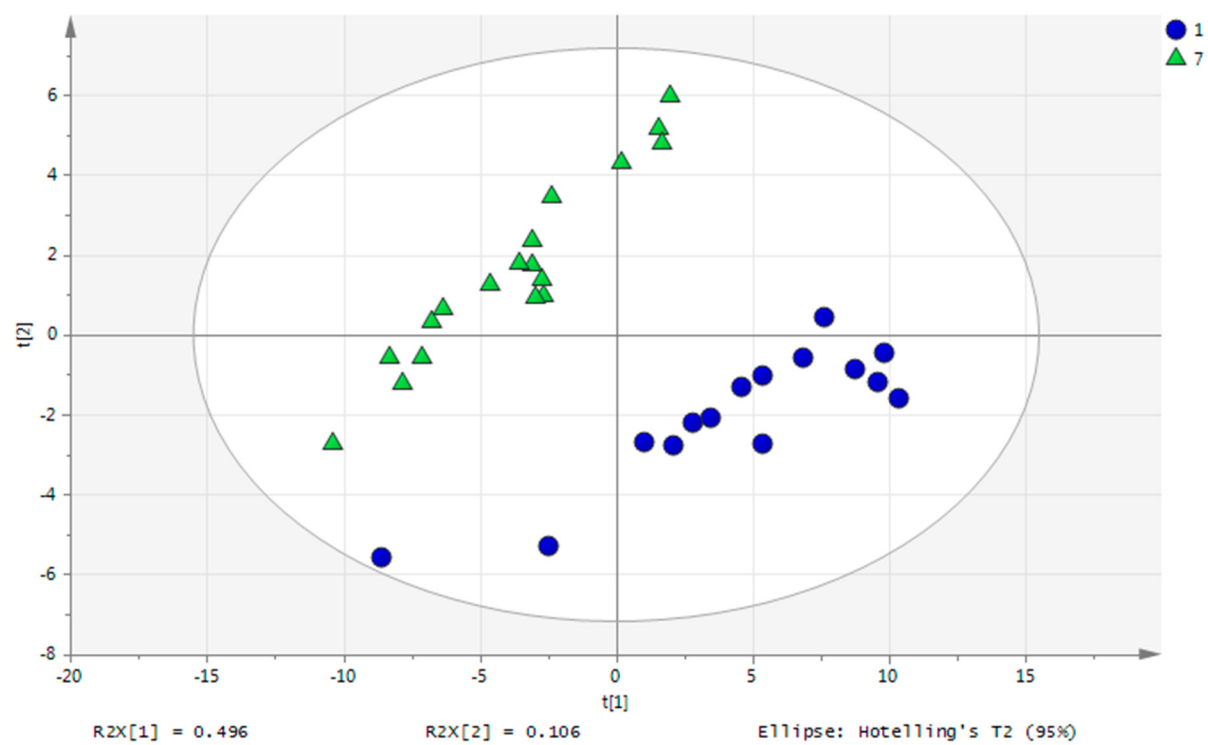

**Figure S4:** PCA scores plot of life-long exercise rats (group B) of the first (blue colored) and last (green colored) sampling time point.

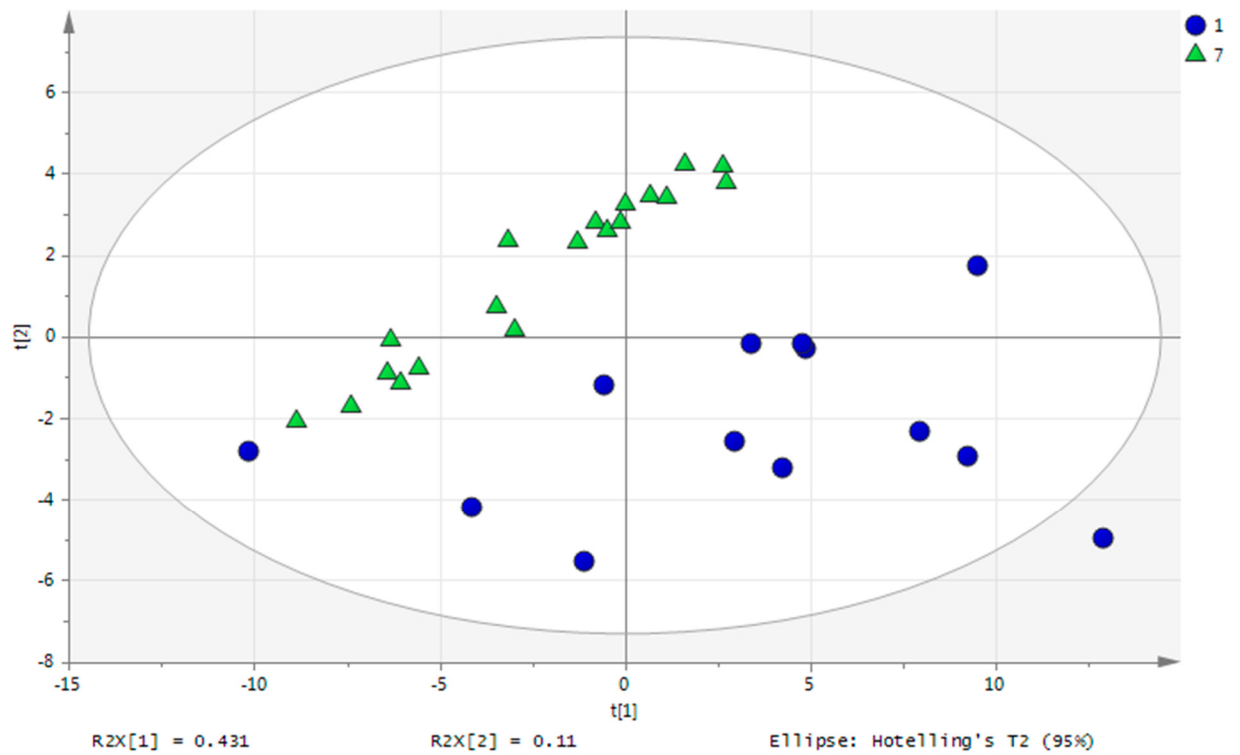

**Figure S5:** PCA scores plot of life-long sedentary rats (group A) of the first (blue colored) and last (green colored) sampling time point.

**Table S2:** The effect of both aging and exercise (% fold change) on 10 metabolites affected by both exercise and aging.

| Metabolites                  | Aging | Exercise |
|------------------------------|-------|----------|
| Arabinose                    | -85   | 32       |
| Methylamine                  | -73   | 32       |
| Myoinositol                  | -58   | 41       |
| Cotinine                     | -49   | -6       |
| Pantothenic acid             | -39   | 14       |
| Threonine                    | -23   | 24       |
| Gamma-aminobutyric acid      | -21   | 11       |
| Leucine                      | -14   | 6        |
| Creatinine                   | 2     | -1       |
| Alpha-Hydroxyisobutyric acid | 4     | 28       |

**Table S3:** Detected compounds found in analyzed whole blood samples using the applied HILIC-MS/MS method.

| Detected metabolites |                        |
|----------------------|------------------------|
| 3-Methylhistidine    | Leucine                |
| Adenine              | Lysine                 |
| Adenosine            | Methionine             |
| Betaine              | Phenylalanine          |
| Choline              | Proline                |
| Citric acid          | Serine                 |
| Citrulline           | Threonine              |
| Creatine             | Tryptophan             |
| Creatinine           | Tyrosine               |
| Cytidine             | Methylamine            |
| Cytosine             | Niacinamide            |
| Glucose              | Ornithine              |
| Glycine              | Pantothenic acid       |
| Histamine            | Picolinic acid         |
| Acetylcarnitine      | Pyruvic acid           |
| Alanine              | Spermidine             |
| Asparagine           | Spermine               |
| Aspartic acid        | Thymidine              |
| Glutamic acid        | Trimethylamine         |
| Glutamine            | Trimethylamine N-oxide |
| Histidine            | Uridine                |
| Isoleucine           | Valine                 |
| Lactic acid          |                        |

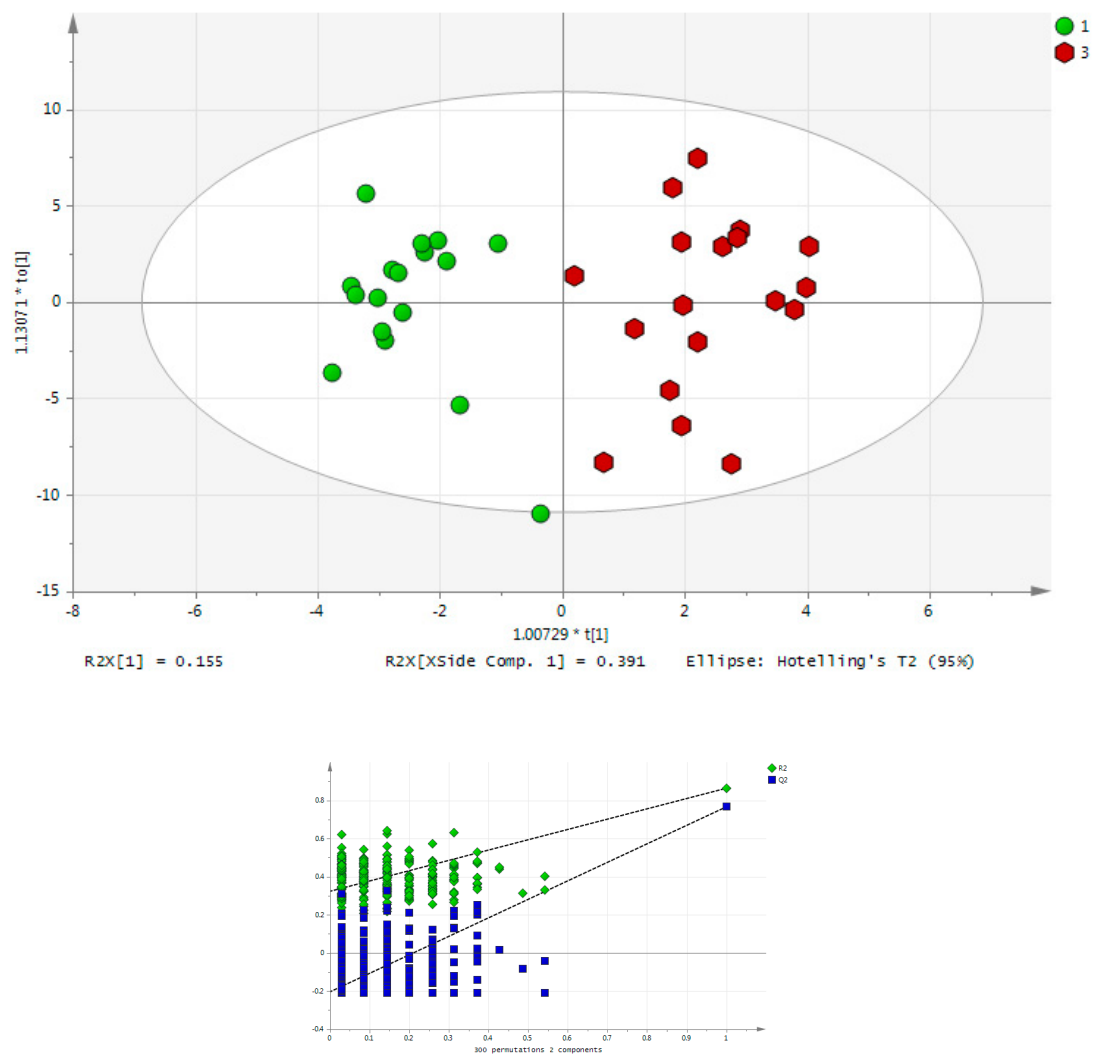

**Figure S6:** OPLS-DA scores plot of the whole blood exercise rat samples between the two sampling time points (8 months of age in green dots and 21 months of age in the red pentagon).

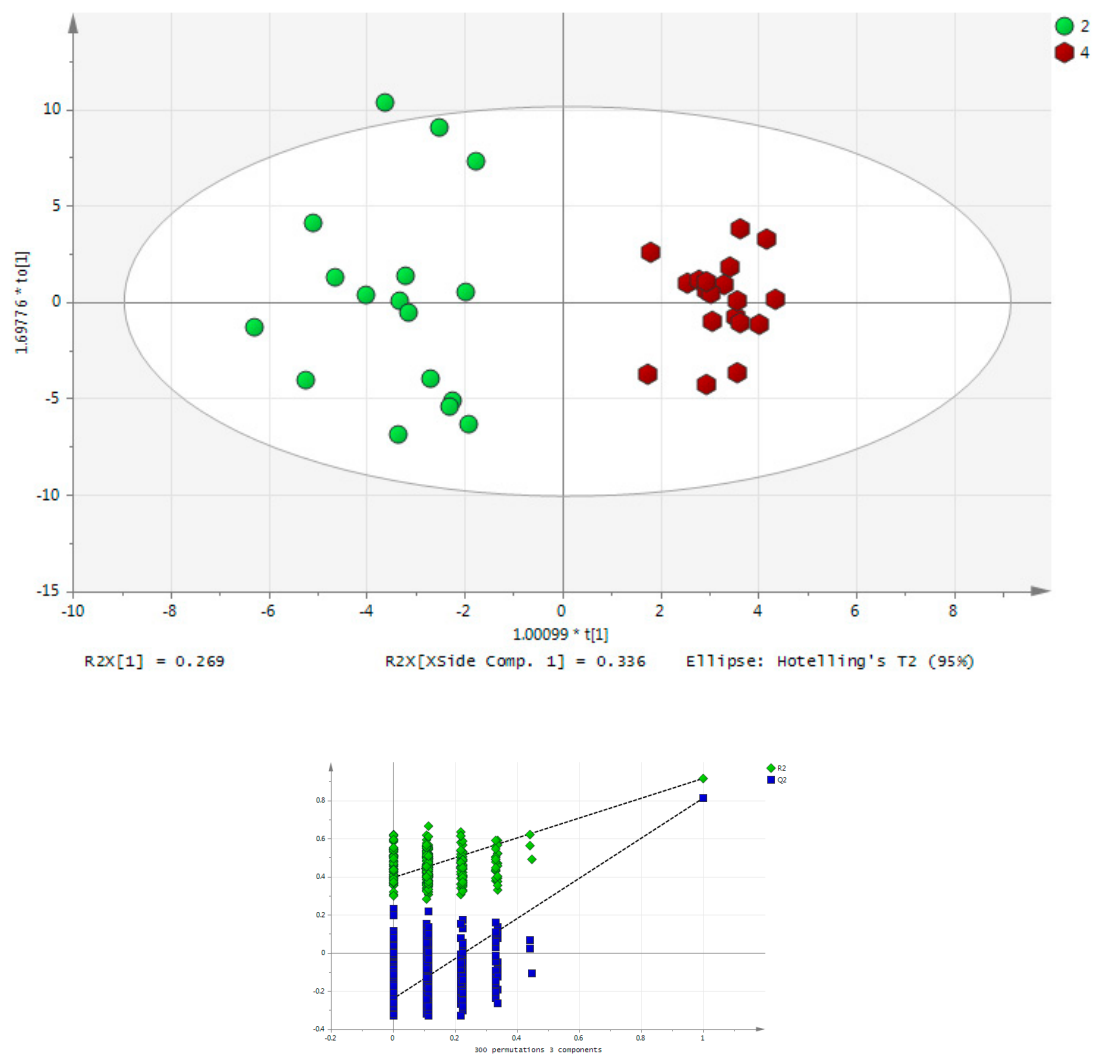

**Figure S7:** OPLS-DA scores plot of the whole blood sedentary rat samples between the two sampling time points (8 months of age in green dots and 21 months of age in the red pentagon).
